# Supplementary material for: Copy number variation in DRC1 is the major cause of primary ciliary dyskinesia in the Japanese population
Source: PubMed Central journal article supplement (PMC7057087; doi:10.1002/mgg3.1137), 2020-01-20

## Figure legend

Supplementary Figure 1: Distribution of PCD families with *DRC1* CNV (red dots) and those with variants other than *DRC1* CNV (black dots).

- *DRC1*
- Other than *DRC1*

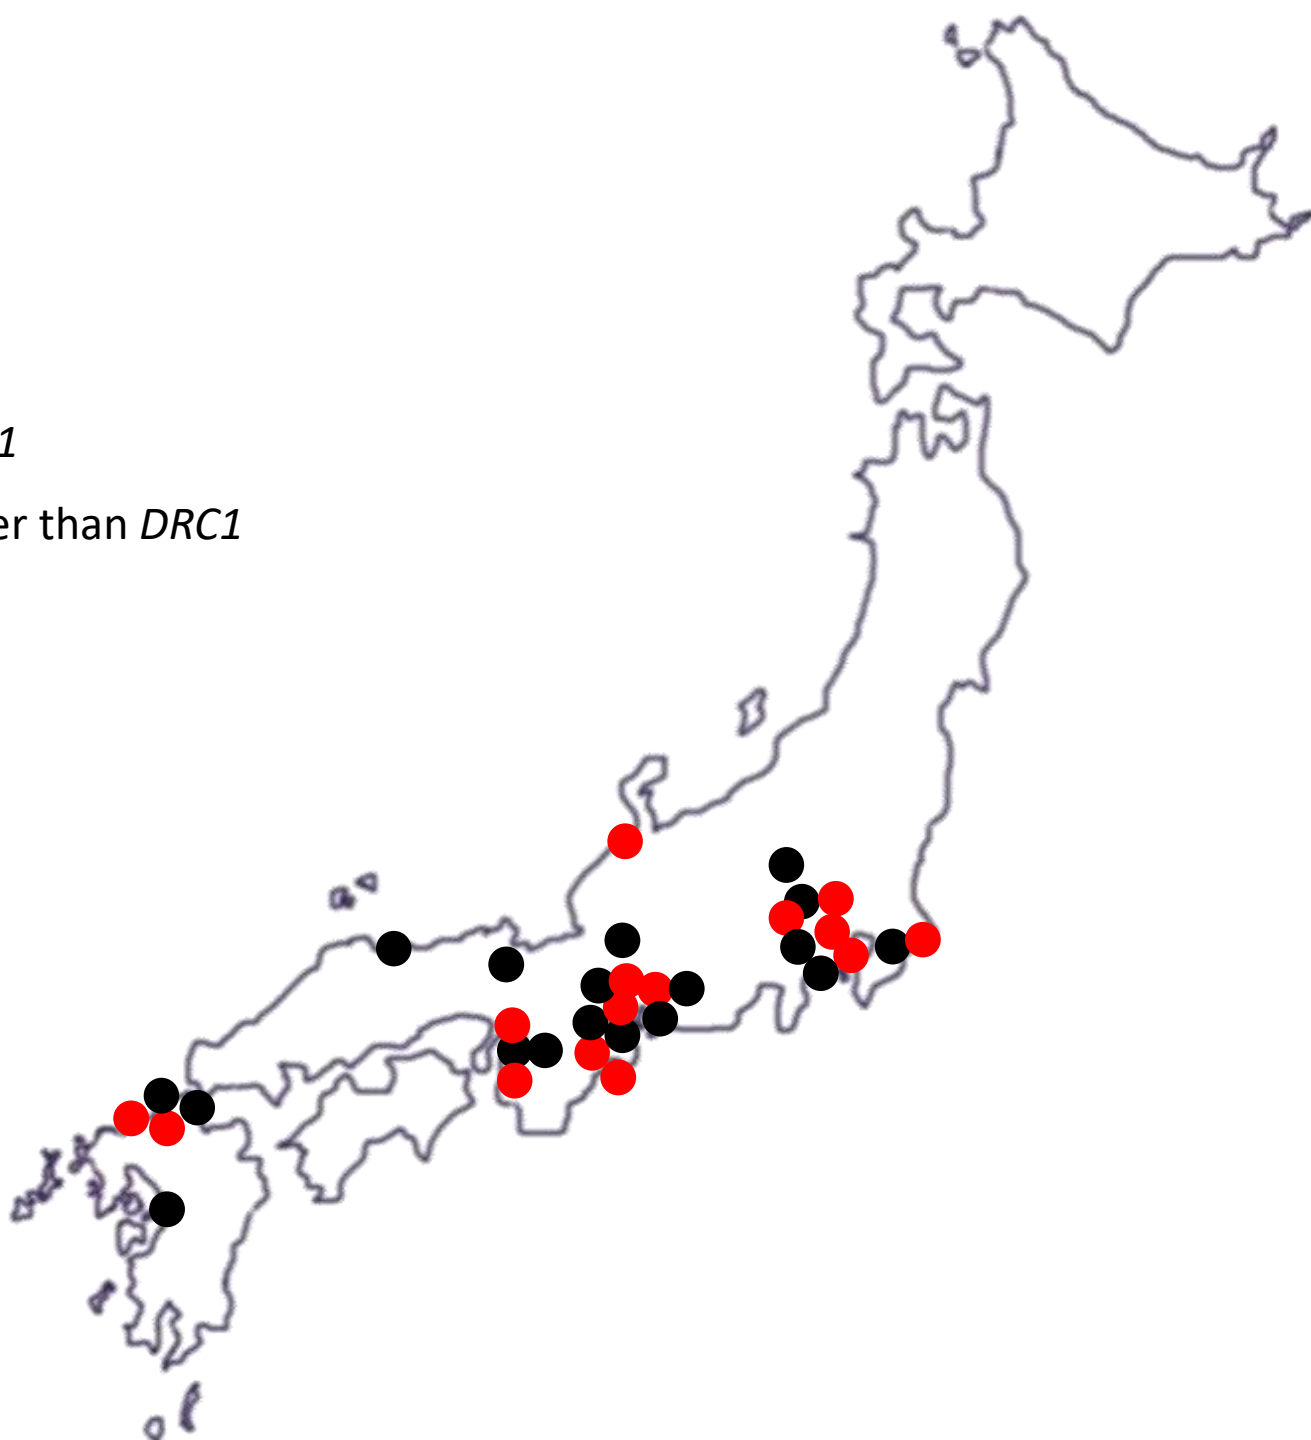

Supplement: MGG3-8-e1137-s001.pdf [file MGG3-8-e1137-s001.pdf]
